# Supplementary material
Source: Research Square preprint supplement (doi:10.21203/rs.3.rs-9237622/v1)
Supplement: Supplementary file 1 [file dce016c4737f34d550f84f35.docx]

| **Table V.**  ***Comparisons of sport imagery scores according to sociodemographic variables (non-significant results)*** | | | | |
| --- | --- | --- | --- | --- |
| **Demographic variable** | **Subscale** | **Groups (n; Mean ± SD)** | **Test value** | **p** |
| **Gender** | Cognitive Imagery | Male (125; 4.52 ± 1.23) – Female (85; 4.65 ± 1.31) | t = −0.76 | .446 |
|  | Motivational Specific Imagery | Male (125; 4.87 ± 1.30) – Female (85; 4.94 ± 1.44) | t = −0.38 | .702 |
|  | Motivational General–Arousal | Male (125; 4.50 ± 1.28) – Female (85; 4.72 ± 1.55) | t = −1.09 | .278 |
|  | Motivational GeneralMastery | Male (125; 4.79 ± 1.62) – Female (85; 5.07 ± 1.55) | t = −1.25 | .211 |
|  | Total Imagery Score | Male (125; 4.64 ± 1.09) – Female (85; 4.79 ± 1.15) | t = −1.00 | .320 |
| **Age** | Motivational Specific Imagery | 12–15 (125; 4.78 ± 1.37) – 16–18 (85; 5.08 ± 1.33) | t = −1.55 | .123 |
|  | Motivational General–Arousal | 12–15 (125; 4.62 ± 1.42) – 16–18 (85; 4.54 ± 1.37) | t = 0.42 | .674 |
|  | Total Imagery Score | 12–15 (125; 4.58 ± 1.11) – 16–18 (85; 4.88 ± 1.11) | t = −1.92 | .056 |
| **School level** | Cognitive Imagery | Secondary school (70; 4.48 ± 1.13) – High school (140; 4.62 ± 1.32) | t = −0.77 | .445 |
|  | Motivational Specific Imagery | Secondary school (70; 4.89 ± 1.32) – High school (140; 4.90 ± 1.38) | t = −0.04 | .966 |
|  | Motivational General–Arousal | Secondary school (70; 4.70 ± 1.40) – High school (140; 4.53 ± 1.40) | t = 0.83 | .408 |
|  | Motivational General–Mastery | Secondary school (70; 4.85 ± 1.45) – High school (140; 4.93 ± 1.67) | t = −0.33 | .745 |
|  | Total Imagery Score | Secondary school (70; 4.67 ± 1.04) – High school (140; 4.71 ± 1.15) | t = −0.25 | .802 |
| **Competition achievement (Medal)** | Motivational General–Arousal | Yes (125; 4.71 ± 1.36) – No (85; 4.42 ± 1.43) | t = 1.48 | .140 |
|  | Motivational General–Mastery | Yes (125; 5.05 ± 1.63) – No (85; 4.69 ± 1.54) | t = 1.63 | .105 |
| **Mother’s education level** | Motivational General–Mastery | Primary (78; 4.71 ± 1.51) – Secondary (56; 5.10 ± 1.63) – High school (51; 4.92 ± 1.65) – University (25; 5.05 ± 1.71) | F = 0.74 | .528 |
| **Father’s education level** | Motivational General–Arousal | Primary (45; 4.38 ± 1.32) – Secondary (48; 4.53 ± 1.17) – High school (75; 4.68 ± 1.43) – University (42; 4.73 ± 1.65) | F = 0.61 | .610 |
|  | Motivational General–Mastery | Primary (45; 4.67 ± 1.77) – Secondary (48; 4.63 ± 1.61) – High school (75; 5.09 ± 1.41) – University (42; 5.12 ± 1.68) | F = 1.39 | .248 |
| **Family monthly income** | Cognitive Imagery | ≤20,000 (42; 4.27 ± 1.00) – 20,001–30,000 (33; 4.51 ± 1.31) – 30,001–40,000 (41; 4.92 ± 1.28) – 40,001–50,000 (36; 4.65 ±1.19) – ≥50,000 (58; 4.53 ± 1.40) | F = 1.44 | .222 |
|  | Motivational Specific Imagery | ≤20,000 (42; 4.70 ± 1.15) – 20,001–30,000 (33; 4.72 ± 1.36) – 30,001–40,000 (41; 5.02 ± 1.31) – 40,001–50,000 (36; 5.06 ± 1.24) – ≥50,000 (58; 4.97 ± 1.59) | F = 0.60 | .664 |
|  | Motivational General–Arousal | ≤20,000 (42; 4.52 ± 1.26) – 20,001–30,000 (33; 4.42 ± 1.35) – 30,001–40,000 (41; 4.43 ± 1.58) – 40,001–50,000 (36; 4.76 ± 1.35) – ≥50,000 (58; 4.74 ± 1.43) | F = 0.59 | .674 |
|  | Motivational General–Mastery | ≤20,000 (42; 4.83 ± 1.56) – 20,001–30,000 (33; 4.76 ± 1.80) – 30,001–40,000 (41; 4.88 ± 1.70) – 40,001–50,000 (36; 4.85 ± 1.46) – ≥50,000 (58; 5.09 ± 1.56) | F = 0.30 | .875 |
|  | Total Imagery Score | ≤20,000 (42; 4.50 ± 0.89) – 20,001–30,000 (33; 4.58 ± 1.13) – 30,001–40,000 (41; 4.84 ± 1.12) – 40,001–50,000 (36; 4.80 ± 1.06) – ≥50,000 (58; 4.75 ± 1.28) | F = 0.69 | .596 |
| **Number of siblings** | Cognitive Imagery | None (7; 5.10 ± 1.57) – 1 (18; 4.51 ± 1.46) – 2 (37; 4.78 ± 1.07) – 3 (65; 4.61 ± 1.15) – 4 (49; 4.59 ± 1.46) – ≥5 (34; 4.16 ± 1.14) | H = 6.45 | .265 |
|  | Motivational General–Arousal | None (7; 4.61 ± 1.32) – 1 (18; 4.46 ± 1.52) – 2 (37; 4.67 ± 1.53) – 3 (65; 4.73 ± 1.18) – 4 (49; 4.43 ± 1.49) – ≥5 (34; 4.53 ± 1.50) | H = 1.47 | .917 |
|  | Motivational General–Mastery | None (7; 4.57 ± 2.32) – 1 (18; 5.04 ± 1.54) – 2 (37; 4.98 ± 1.31) – 3 (65; 4.91 ± 1.59) – 4 (49; 4.91 ± 1.73) – ≥5 (34; 4.79 ± 1.68) | H = 0.35 | .997 |
|  | Total Imagery Score | None (7; 5.16 ± 1.29) – 1 (18; 4.72 ± 1.25) – 2 (37; 4.90 ± 0.91) – 3 (65; 4.74 ± 1.07) – 4 (49; 4.62 ± 1.34) – ≥5 (34; 4.41 ± 0.92) | H = 5.28 | .383 |
| **Years of sport participation** | Motivational General–Arousal | 0–2 (104; 4.55 ± 1.32) – 2–4 (53; 4.77 ± 1.45) – ≥4 (53; 4.49 ± 1.49) | F = 0.61 | .545 |
|  | Motivational General–Mastery | 0–2 (104; 4.68 ± 1.51) – 2–4 (53; 4.95 ± 1.65) – ≥4 (53; 5.30 ± 1.66) | F = 2.68 | .071 |
| **Participation in non-sport activities** | Cognitive Imagery | Yes (147; 4.66 ± 1.26) – No (63; 4.36 ± 1.24) | t = 1.59 | .113 |
|  | Motivational Specific Imagery | Yes (147; 4.97 ± 1.33) – No (63; 4.74 ± 1.43) | t = 1.12 | .263 |
|  | Motivational General–Arousal | Yes (147; 4.58 ± 1.39) – No (63; 4.63 ± 1.43) | t = −0.25 | .805 |
|  | Motivational General–Mastery | Yes (147; 4.93 ± 1.61) – No (63; 4.85 ± 1.58) | t = 0.34 | .738 |
|  | Total Imagery Score | Yes (147; 4.76 ± 1.10) – No (63; 4.57 ± 1.14) | t = 1.10 | .271 |
| **Weekly training frequency** | Motivational Specific Imagery | 1–2 (62; 4.51 ± 1.33) – 2–4 (76; 5.06 ± 1.17) – 5–6 (42; 5.10 ± 1.44) – ≥6 (30; 5.02 ± 1.60) | F = 2.54 | .057 |
|  | Motivational General–Arousal | 1–2 (62; 4.53 ± 1.39) – 2–4 (76; 4.55 ± 1.37) – 5–6 (42; 4.74 ± 1.36) – ≥6 (30; 4.62 ± 1.56) | F = 0.24 | .871 |
|  | Motivational General–Mastery | 1–2 (62; 4.68 ± 1.57) – 2–4 (76; 4.82 ± 1.40) – 5–6 (42; 4.98 ± 1.93) – ≥6 (30; 5.48 ± 1.56) | F = 1.81 | .146 |
| **Province** | Cognitive Imagery | Ağrı (66; 4.74 ± 1.27) – Iğdır (59; 4.65 ± 1.12) – Kars (85; 4.39 ± 1.33) | F = 1.58 | .209 |
|  | Motivational Specific Imagery | Ağrı (66; 5.01 ± 1.21) – Iğdır (59; 5.14 ± 1.20) – Kars (85; 4.65 ± 1.53) | F = 2.58 | .078 |
|  | Motivational General–Mastery | Ağrı (66; 5.12 ± 1.63) – Iğdır (59; 4.73 ± 1.36) – Kars (85; 4.86 ± 1.72) | F = 0.97 | .381 |
|  | Total Imagery Score | Ağrı (66; 4.85 ± 1.07) – Iğdır (59; 4.83 ± 1.03) – Kars (85; 4.49 ± 1.18) | F = 2.53 | .082 |
